# Supplementary material for: Prognostic significance of neutrophil to lymphocyte ratio in ovarian cancer: evidence from 4,910 patients
Source: PubMed Central journal article supplement (PMC5620309; doi:10.18632/oncotarget.20196), 2017-08-10
Supplement: oncotarget-08-68938-s001.pdf [file oncotarget-08-68938-s001.pdf]

## **Prognostic significance of neutrophil to lymphocyte ratio in ovarian cancer: evidence from 4,910 patients**

### **SUPPLEMENTARY MATERIALS**

**Supplementary Table 1: The protocol of this review was registered with PROSPERO (No. CRD 42016052250).**

**See Supplementary File 1**

**Supplementary Table 2: PRISMA Checklist. (DOC).**

**See Supplementary File 2**
